# Supplementary material for: Embryos assist morphogenesis of others through calcium and ATP signaling mechanisms in collective teratogen resistance
Source: PubMed Central journal article supplement (PMC10794468; doi:10.1038/s41467-023-44522-2), 2024-01-17
Supplement: 41467_2023_44522_MOESM3_ESM.pdf [file 41467_2023_44522_MOESM3_ESM.pdf]

## **Description of Additional Supplementary Files**

**File Name:** Supplementary Movie 1

**Description:** Calcium waves travels across an injured embryo. (top) and across adjacent, un-injured embryos (middle and bottom). Bright spot on injured embryo is the site of injury. Injured embryo is on left and un-injured embryos is on right (middle). Injured embryo is in the center and surrounded by un-injured embryos (bottom).

**File Name:** Supplementary Movie 2

**Description:** In a pair of embryos, a calcium wave travels from an injured embryo to an adjacent, uninjured embryo.

**File Name:** Supplementary Movie 3

**Description:** In a group of 10 embryos, multiple calcium waves travel from an injured embryo to adjacent, uninjured embryos.

**File Name:** Supplementary Movie 4

**Description:** ATP is sufficient to elicit a calcium response. The addition of ATP into a channel with a single embryo is able to initiate a calcium response in the un-injured embryo. Site of ATP addition is labeled on the left side of the channel while an un-injured embryo was placed on the right side.
